# Supplementary material for: Achieving long-lived white circularly polarized luminescence from carbonized polymer dots via phosphorescence resonance energy transfer
Source: Royal Society of Chemistry journal article supplement (doi:10.1039/d4cc00532e), 2024-01-01
Supplement: d4cc00532e1.pdf [file d4cc00532e1.pdf]

**Electronic Supplemental Information for**

**Achieving Long-Lived White Circularly Polarized Luminescence from  
Carbonized Polymer Dots via Phosphorescence Resonance Energy Transfer**

Feixiang Wang, Yijie Wang, Rui Guo, Yushuang Wu, Shengju Zhou,\* Haibin Xiao\*

and Xiaofeng Sun\*

School of Chemistry and Chemical Engineering, Shandong University of Technology,  
Zibo, 255000, P. R. China.

Author to whom correspondence should be addressed, E-mail:

shengjuzhou@sdut.edu.cn (Shengju Zhou); haibinxiao@sdut.edu.cn (Haibin Xiao);

xiaofengsun@sdut.edu.cn (Xiaofeng Sun)

## **Experimental**

### ***Materials***

All chemical chemicals were used directly without further purification. Sodium alginate, L-lysine, sodium fluorescein (Fluc) and sulforhodamine 101 (SR101) were purchased from Aladdin Chemicals Co. Ltd (Shanghai, China). Deionized water was used in all experiments and obtained from a Millipore water purification system (Milli-Q, Millipore).

### ***Synthesis of CPDs***

Sodium alginate (0.8 g) was dissolved in 4 mL deionized water and L-lysine (3.2 g) was dissolved in 4 mL deionized water. The above two solutions are mixed and stirred uniformly. The mixed solution was transferred to a poly (tetrafluoroethylene) (Teflon)-lined autoclave (25 mL) and heated for 10 h under 120 °C. After that, the reactor was cooled down to room temperature. The obtained solution was dialyzed in dialysis bag (1000 Da) against deionized water to remove small molecules. Solid CPDs could be obtained via freeze-drying.

### ***Preparation of green afterglow films (CPDs/Fluc)***

CPDs (10 mg) was dispersed in PVA aqueous solutions (2 mL) and then stirred for 2 h. After that, different amounts of Fluc stock solutions (5 mg mL<sup>-1</sup>) was added to the PVA solutions of CPDs. Then, the mixed solution was subjected to ultrasonication for 2 h. The afterglow films were obtained after drying at 80 °C for 3 h.

### ***Preparation of red afterglow films (CPDs/SR101)***

The Fluc was replaced with SR101 and the synthesis followed the method of

synthesizing CPDs/Fluc film.

### ***Preparation of white afterglow films (CPDs/Fluc/SR101)***

CPDs (10 mg) was dispersed in PVA aqueous solutions (2 mL) and then stirred for 2 h. After that, 0.025 mL Fluc solutions ( $5 \text{ mg mL}^{-1}$ ) was added to the PVA solutions of CPDs. Then, different amounts of SR101 stock solutions ( $5 \text{ mg mL}^{-1}$ ) was added to the mixed solution and stirred for 1 h. Then, the mixed solution was subjected to ultrasonication for 2 h. The afterglow films were obtained after drying at  $80 \text{ }^{\circ}\text{C}$  for 3 h.

### ***Characterizations***

The high resolution transmission electron microscopy (HR-TEM) images were recorded on JEOL 2100 system. Raman spectra were collected by laser micro-Raman spectroscopy. X-ray diffraction (XRD) patterns were obtained by a PANalytical X'Pert Powder diffractometer (PANalytical, Holland) with  $\text{Cu K}\alpha$  radiation. X-ray photoelectron spectroscopy (XPS) data were collected by an X-ray photoelectron spectrometer (ESCALAB 250). The FT-IR spectrum was obtained by a VERTEX-70/70v FT-IR spectrometer. The absorption spectra were collected by a Shimadzu UV-2600 spectrophotometer. Afterglow decay curves and photoluminescence spectra were measured by a Edinburgh FS5 fluorescence spectrofluorometer. Circular dichroism (CD) spectra were measured on a JASCO J-1500 instrument. Circularly polarized luminescence (CPL) spectra were measured by a JASCO CPL-200.

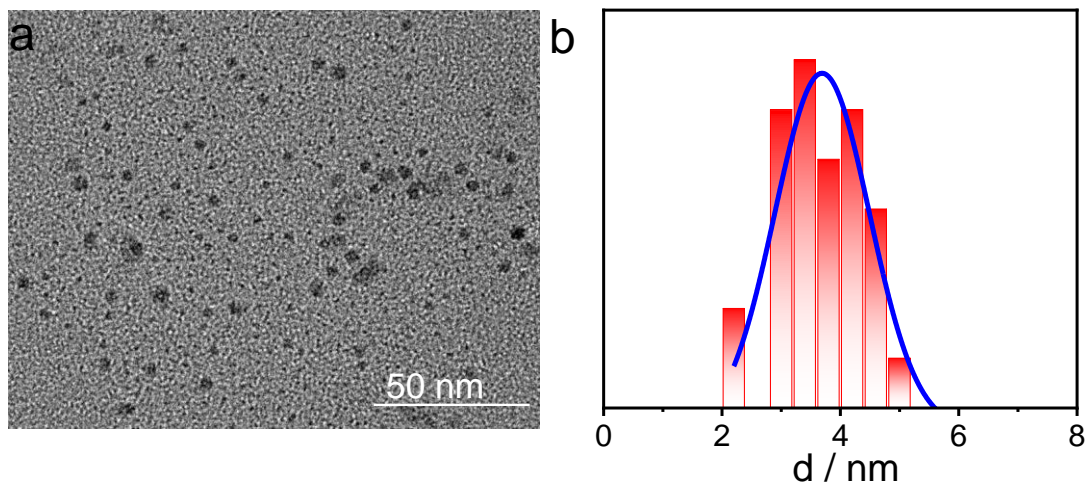

**Fig. S1** (a) HR-TEM image of CPDs. (b) Size distribution histogram of CPDs.

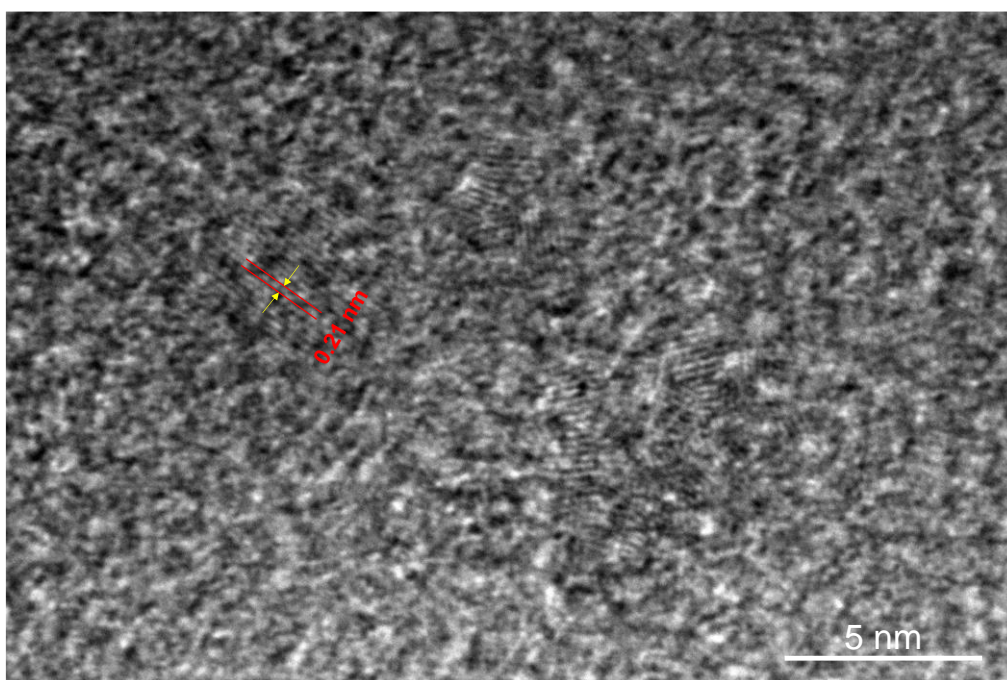

**Fig. S2** HR-TEM image and lattice spacing of CPDs.

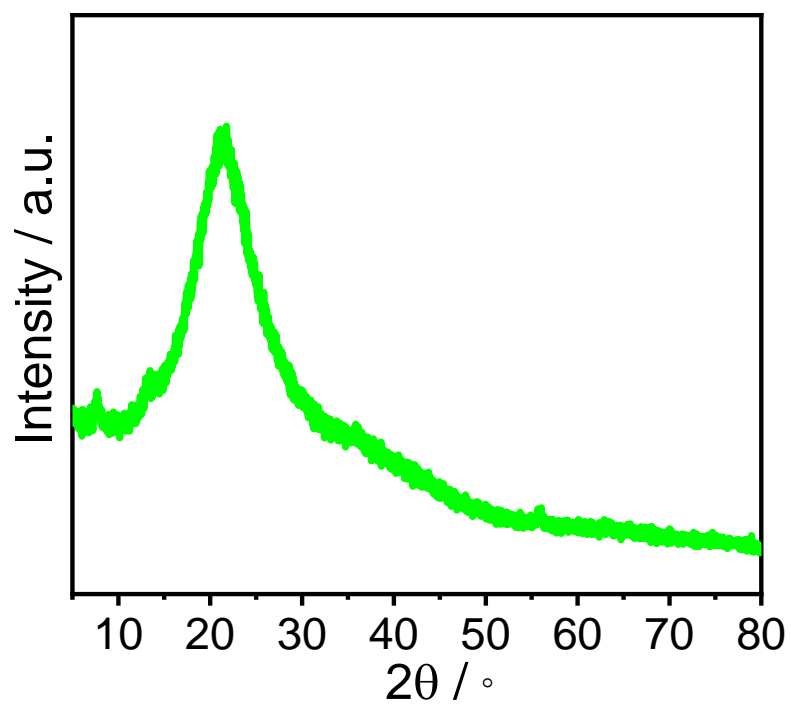

**Fig. S3** XRD pattern of CPDs.

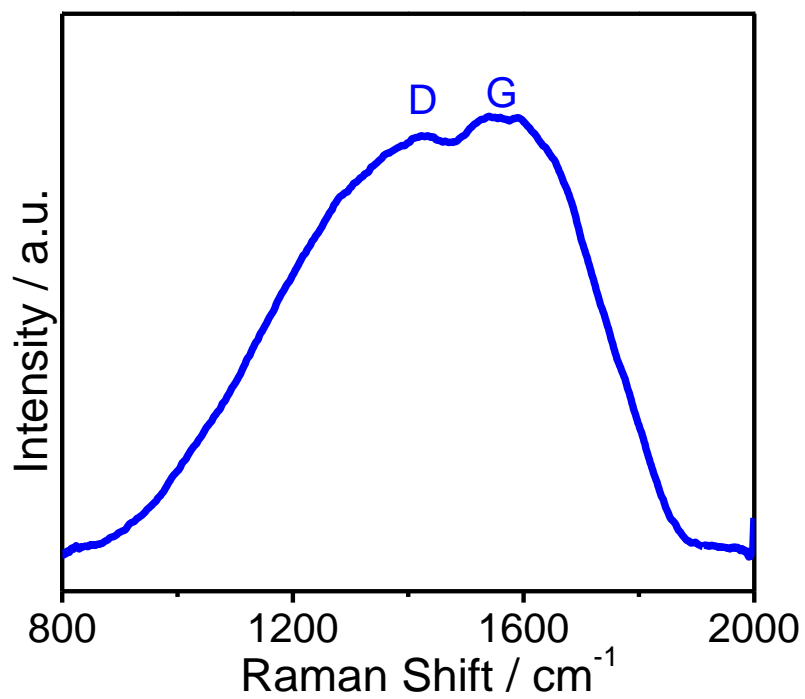

**Fig. S4** Raman spectrum of CPDs.

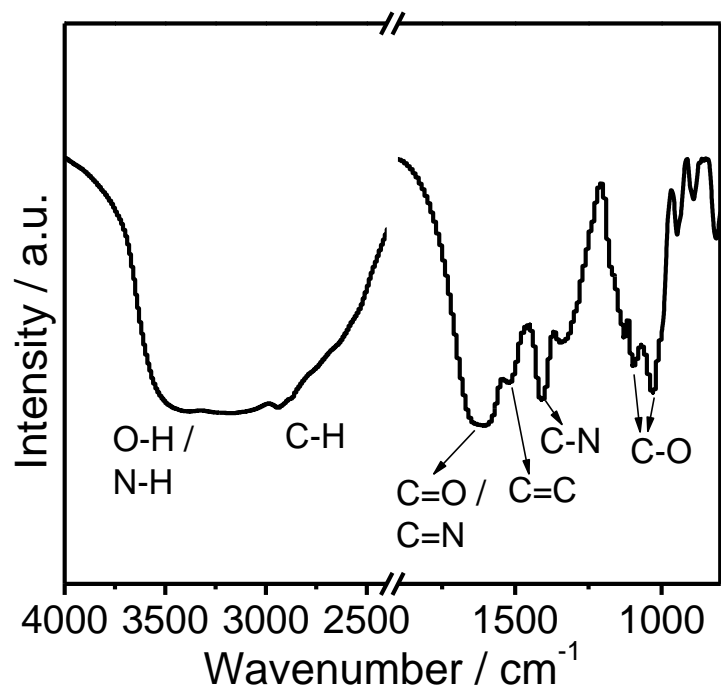

**Fig. S5** FT-IR spectrum of CPDs.

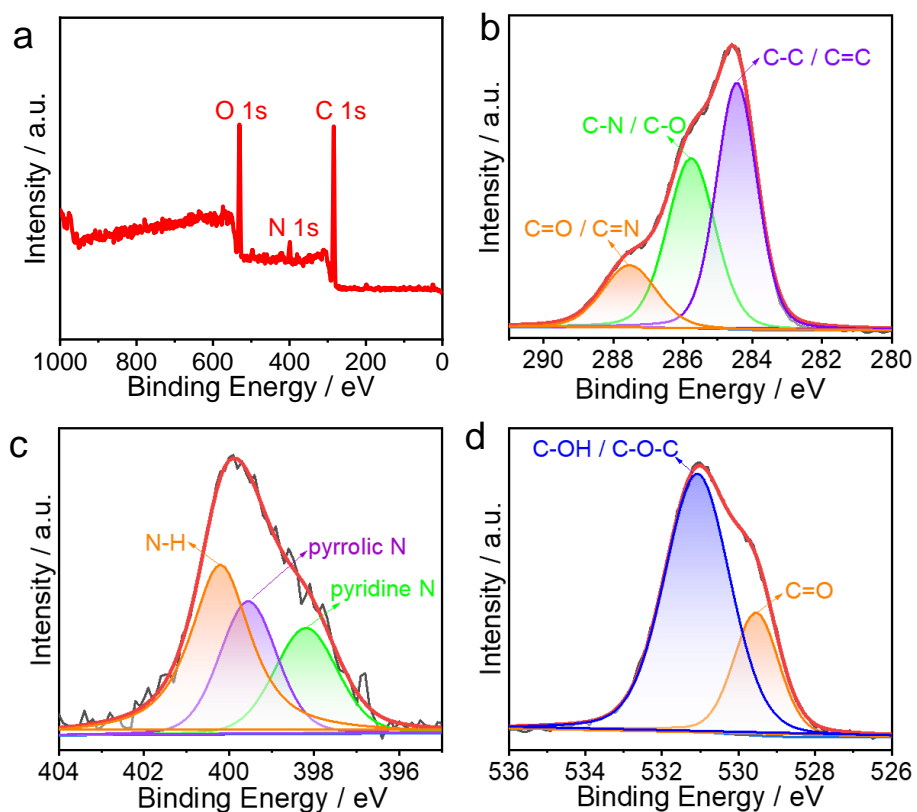

**Fig. S6** (a) XPS survey spectra of CPDs. High-resolution XPS C 1s spectra (b), N 1s spectra (c), O 1s spectra (d) of CPDs.

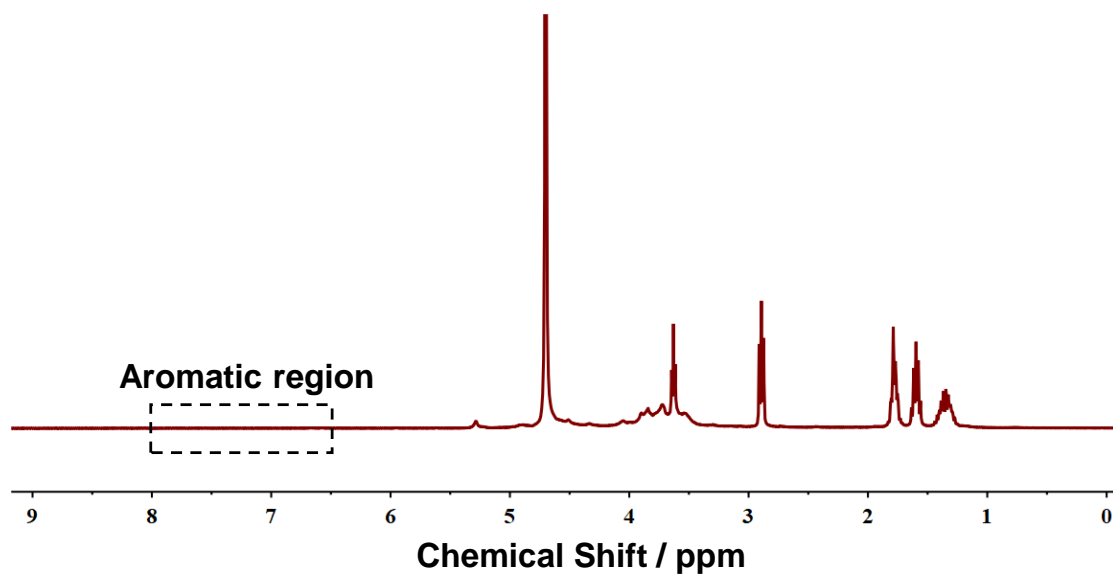

**Fig. S7**  $^1\text{H}$  NMR spectrum of CPDs.

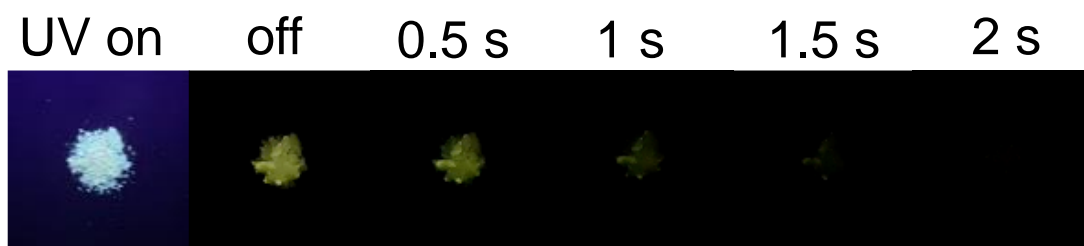

**Fig. S8** Photographs of CPDs powder taken under a UV lamp (365 nm) on and off, respectively.

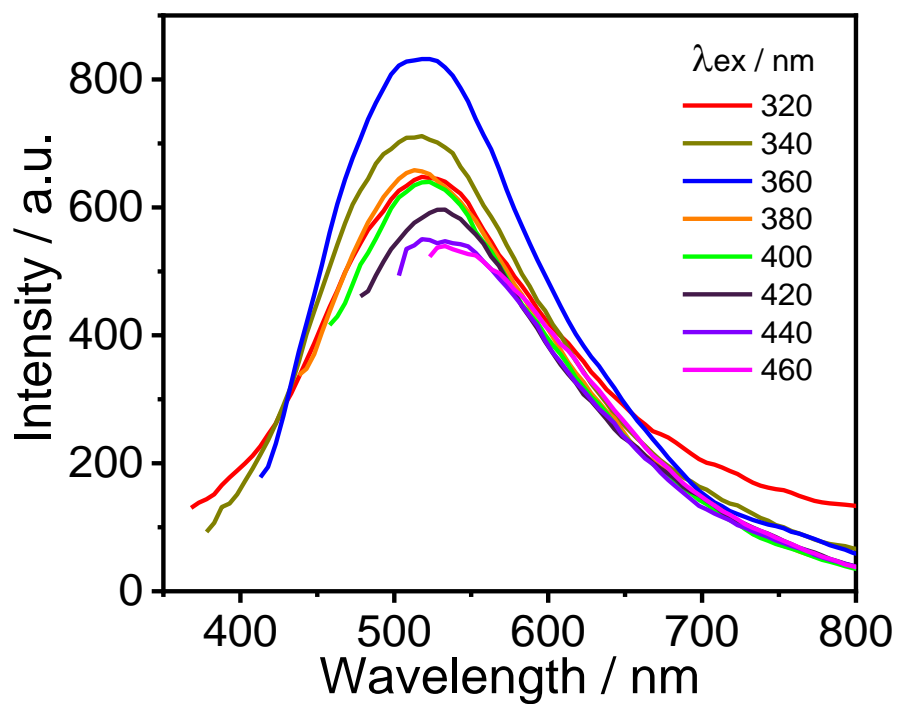

**Fig. S9** Phosphorescence spectra of CPDs at the different excitation wavelengths.

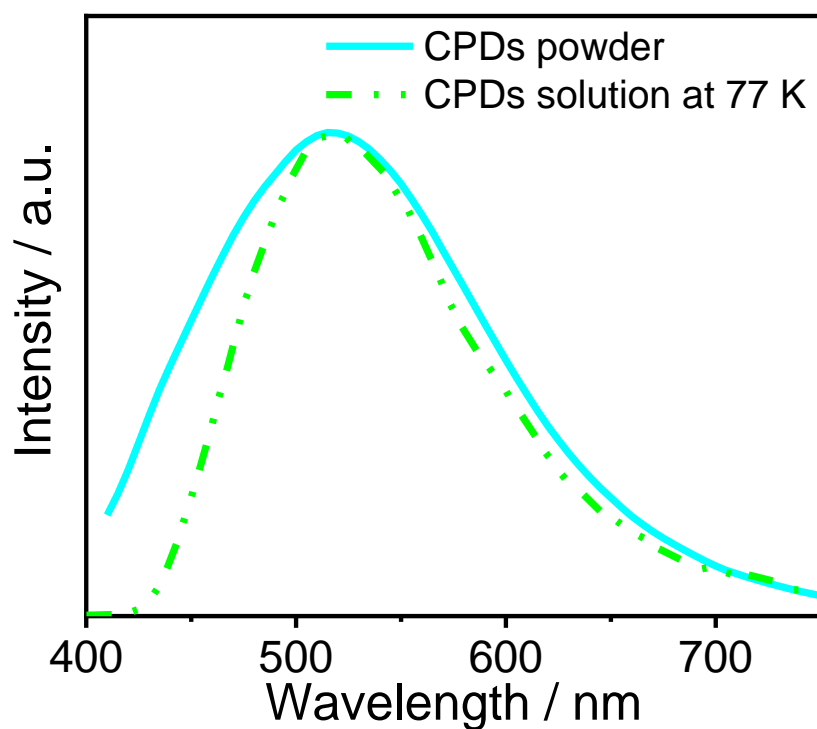

**Fig. S10** The RTP emission spectra of CPDs powder and CPDs solution at 77 K excited at 360 nm.



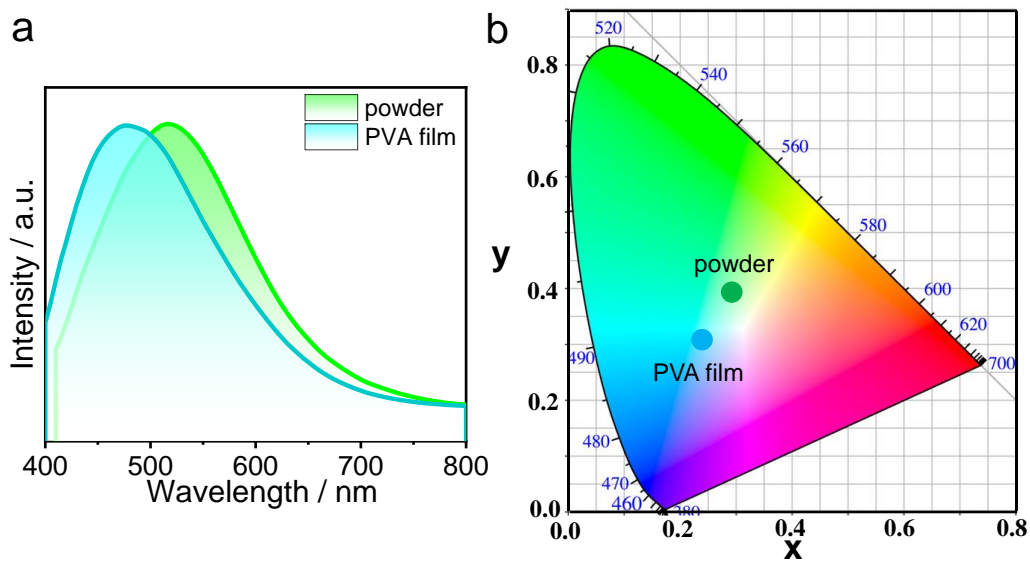

**Fig. S11** The RTP emission spectra (a) and CIE chromaticity coordinates (b) of CPDs powder and CPDs PVA film excited at 360 nm.

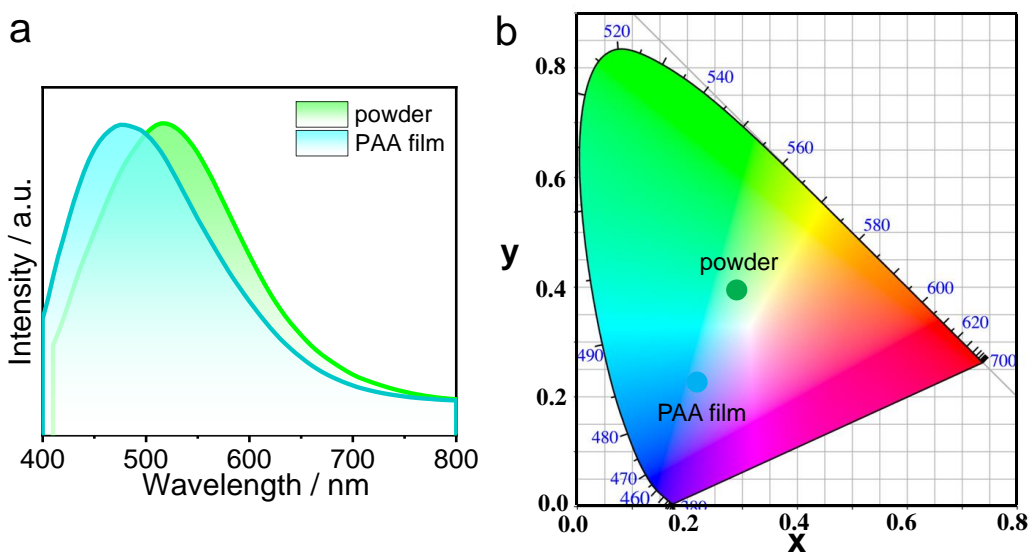

**Fig. S12** The RTP emission spectra (a) and CIE chromaticity coordinates (b) of CPDs powder and CPDs PAA film excited at 360 nm.

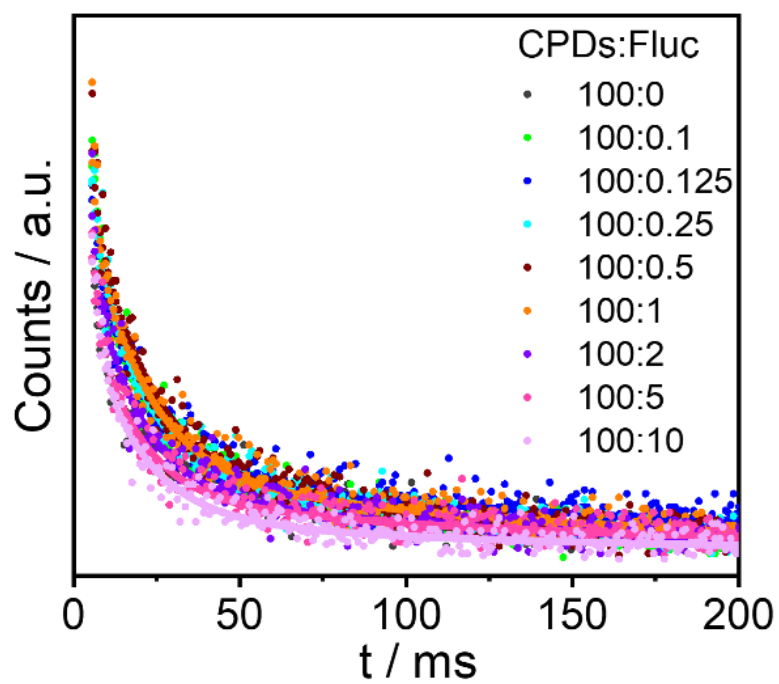

**Fig. S13** Afterglow decay monitored at the donor of CPDs-Fluc codoped PVA films.

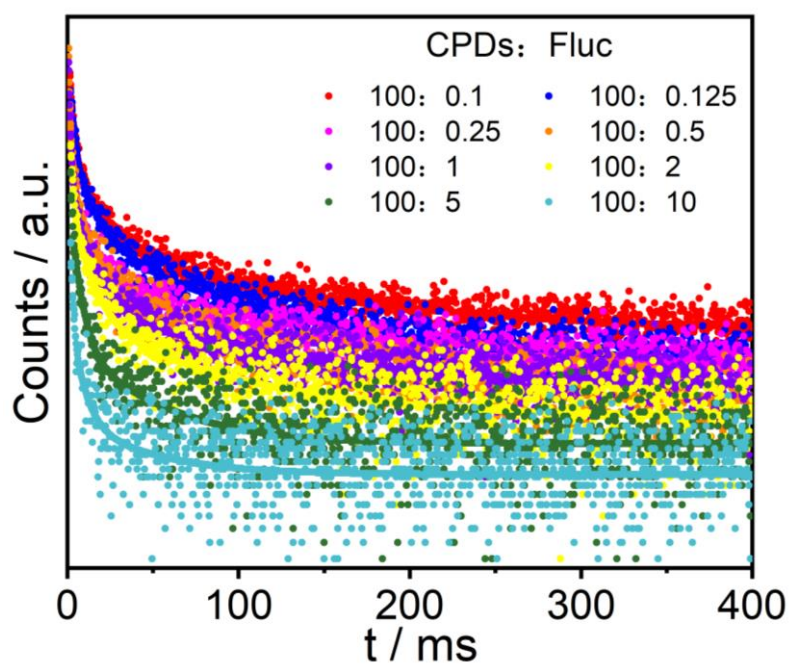

**Fig. S14** Afterglow decay monitored at the acceptor of CPDs-Fluc codoped PVA films.

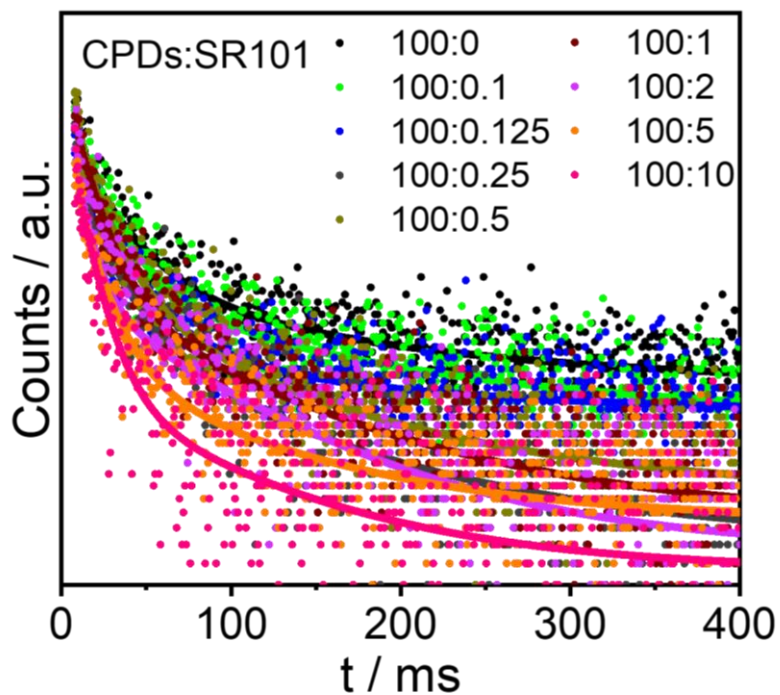

**Fig. S15** Afterglow decay monitored at the donor of CPDs-SR101 codoped PVA films.

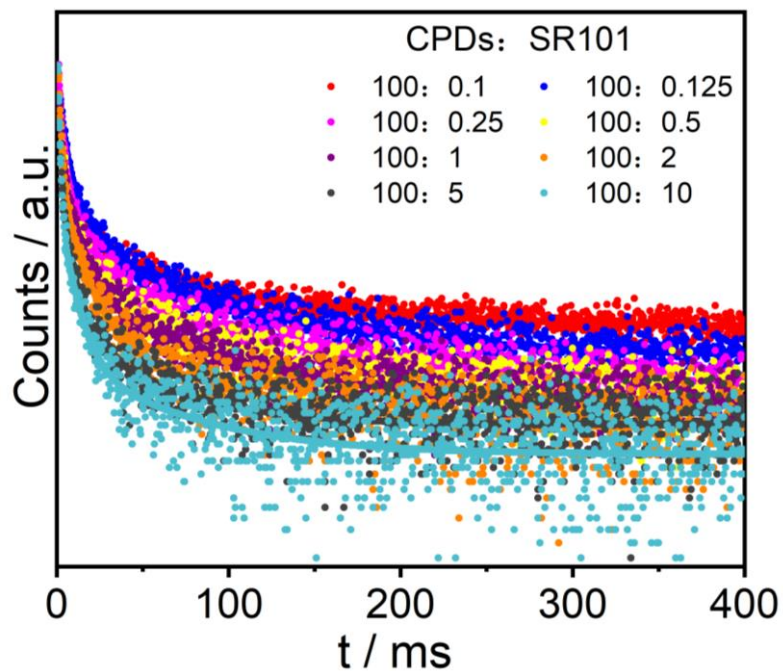

**Fig. S16** Afterglow decay monitored at the acceptor of CPDs-SR101 codoped PVA films.

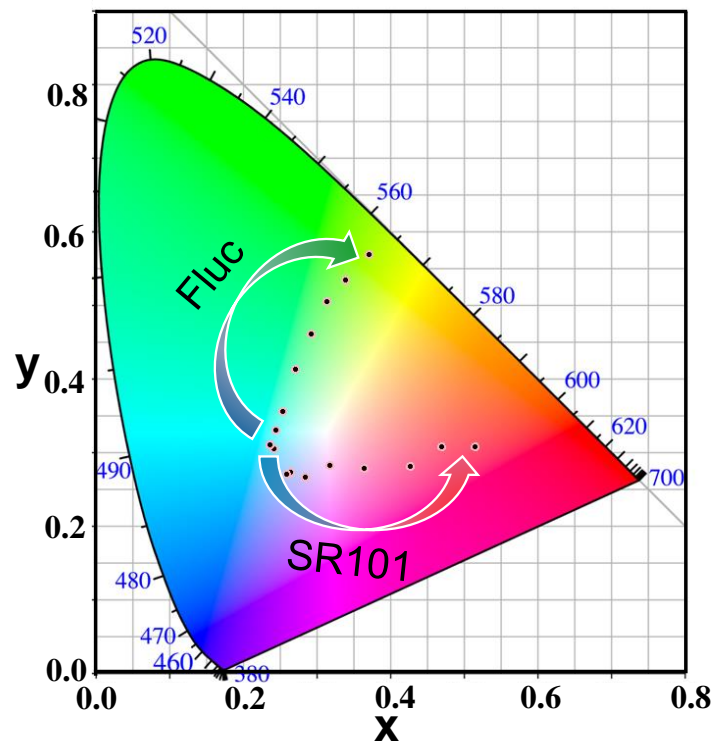

**Fig. S17** CIE chromaticity coordinates of CPDs-Fluc/CPDs-SR101 codoped PVA films at different doping weight concentrations.

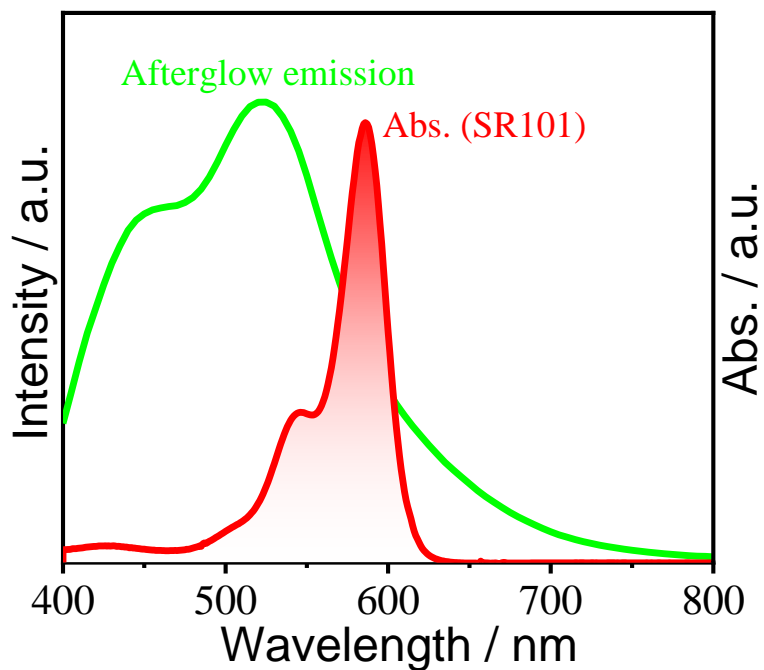

**Fig. S18** Overlapped afterglow emission spectrum of energy donors (CPDs/Fluc) and absorption spectrum of energy acceptor (SR101).

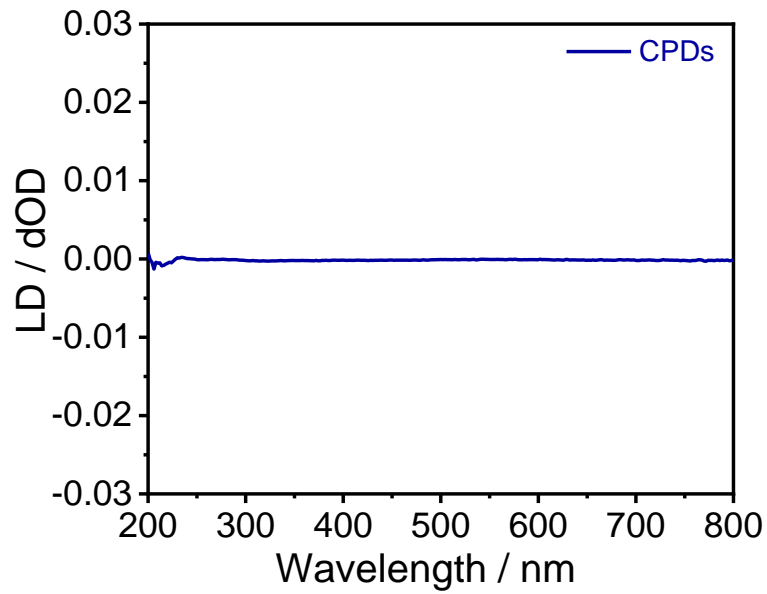

**Fig. S19** Linear polarization of the CPDs PVA film.

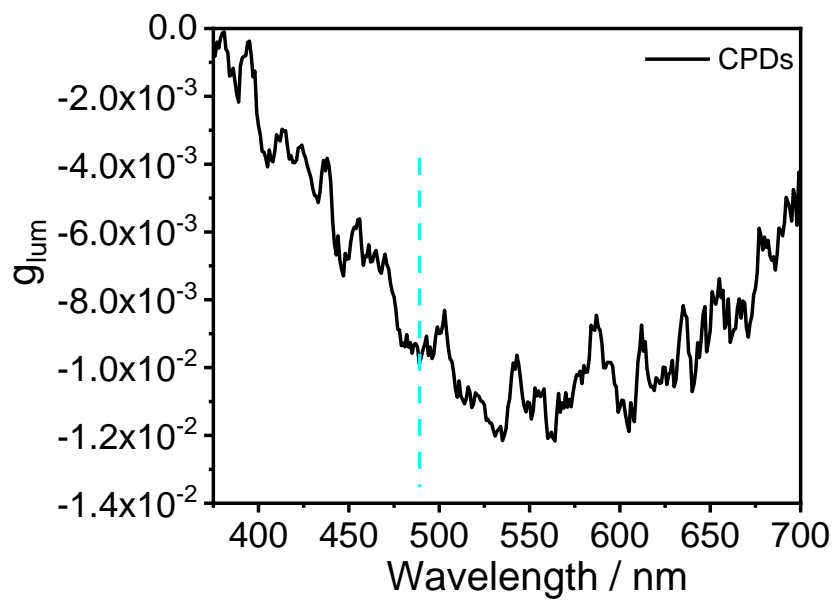

**Fig. S20** CPL  $g_{lum}$  spectrum of the CPDs PVA film.

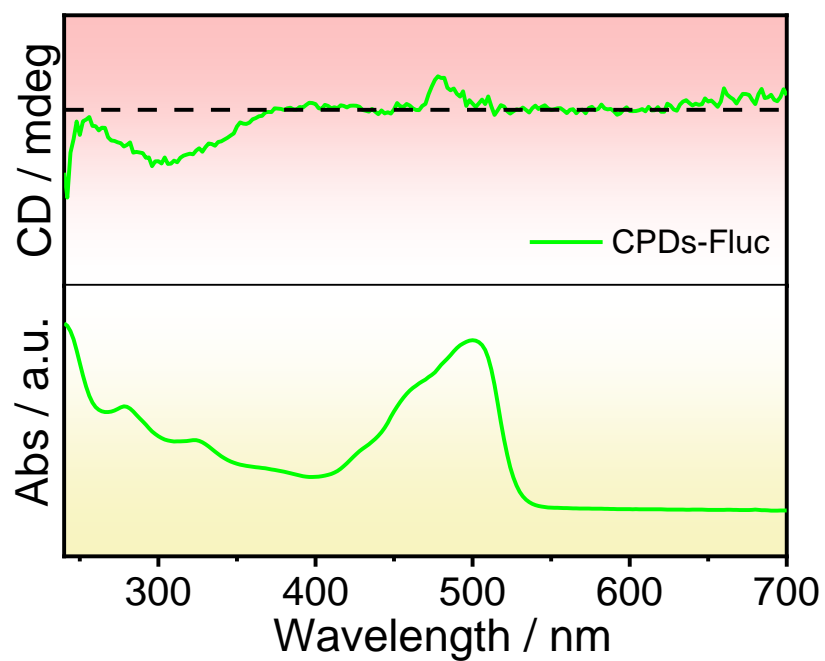

**Fig. S21** CD and UV-vis spectra of CPDs-Fluc codoped PVA film.

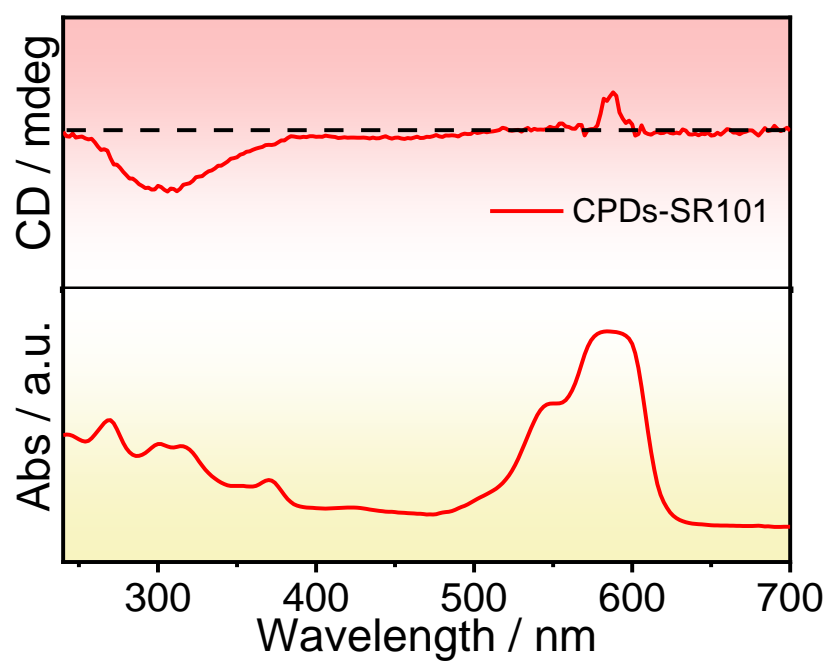

**Fig. S22** CD and UV-vis spectra of CPDs-SR101 codoped PVA film.

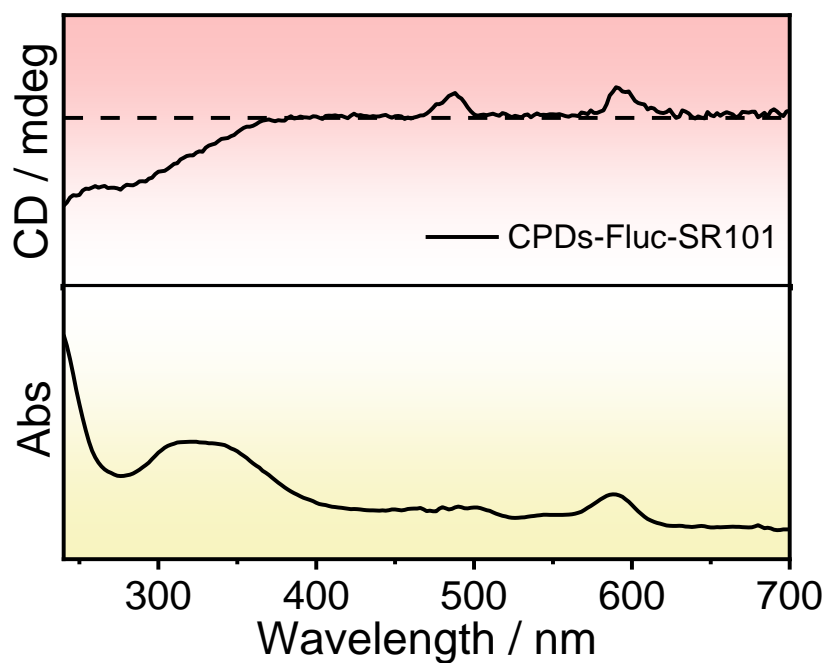

**Fig. S23** CD and UV-vis spectra of CPDs-Fluc-SR101 codoped PVA film.

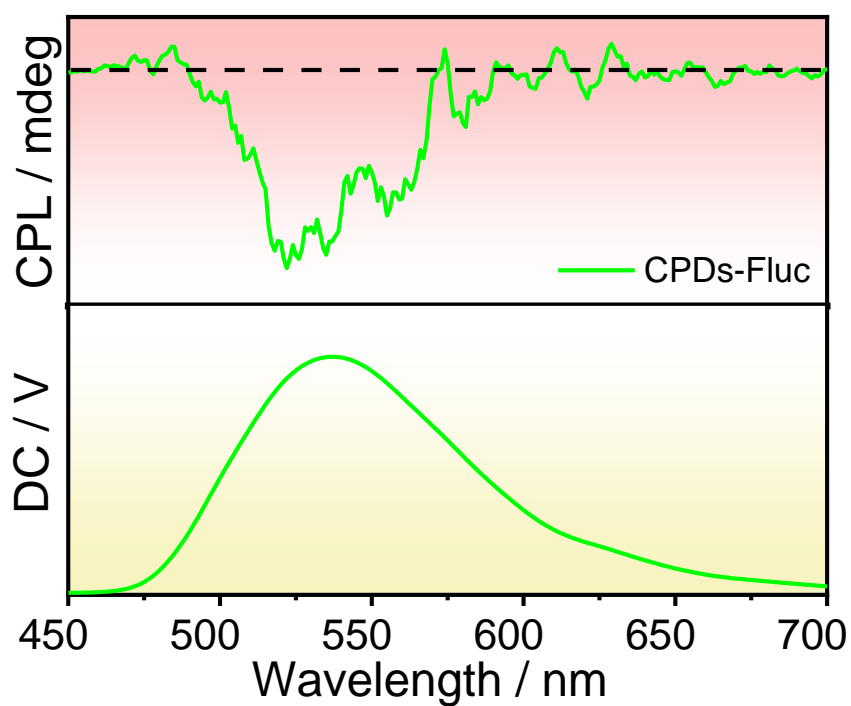

**Fig. S24** CPL spectra of CPDs-Fluc codoped PVA film.

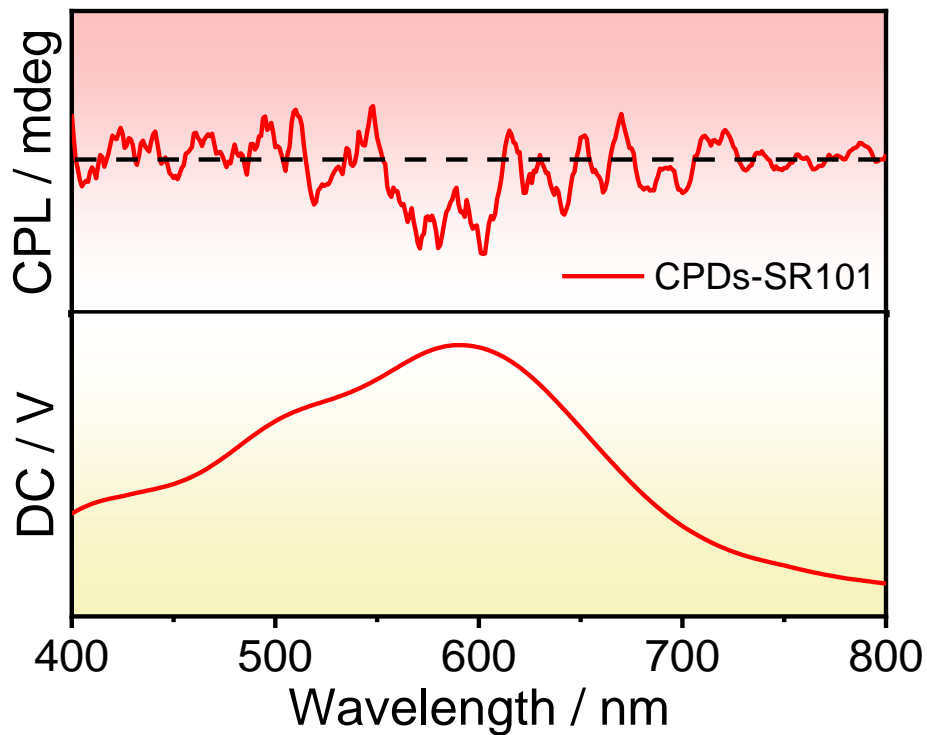

**Fig. S25** CPL spectra of CPDs-SR101 codoped PVA films.

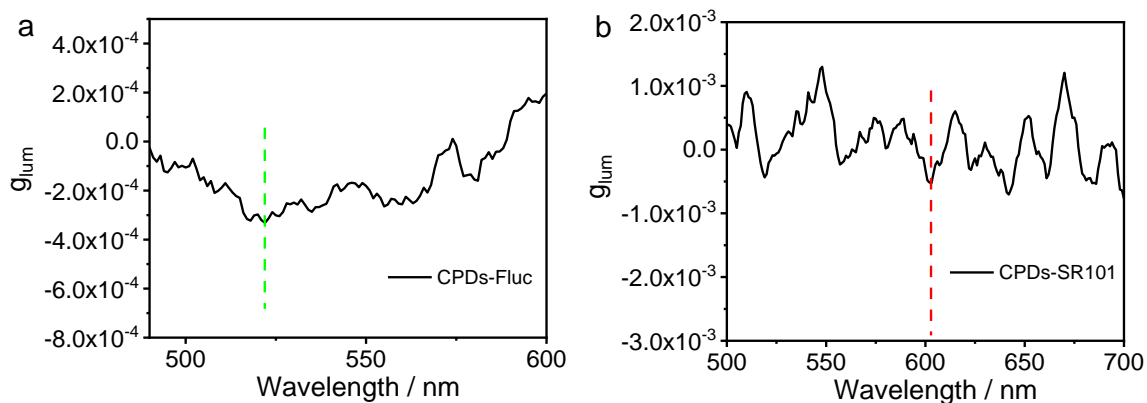

**Fig. S26** CPL  $g_{lum}$  spectra of CPDs-Fluc codoped PVA film (a) and CPDs-SR101 codoped PVA film (b).



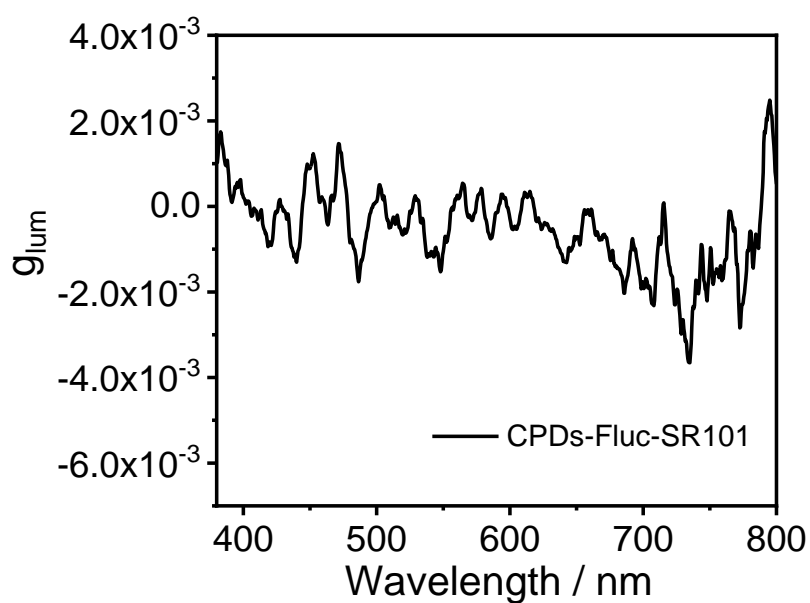

**Fig. S27** CPL  $g_{lum}$  spectra of CPDs-Fluc-SR101 codoped PVA film.

**Table S1.** The  $\Delta Est$  value of the CPDs under different excitation wavelengths.

| $\lambda_{Ex} / \text{nm}$ | 320  | 340  | 360  | 380  | 400  | 420  | 440  |
|----------------------------|------|------|------|------|------|------|------|
| $\Delta Est$ (eV)          | 0.26 | 0.24 | 0.25 | 0.23 | 0.22 | 0.20 | 0.19 |

**Table S2.** Fitting parameters of the RTP decay curves of the CPDs powder under excitation at 360 nm.

| $\lambda_{Em} / \text{nm}$ | $\tau_1 / \text{ms}$ | $\tau_2 / \text{ms}$ | $\tau_3 / \text{ms}$ | $\langle \tau \rangle / \text{ms}$ |
|----------------------------|----------------------|----------------------|----------------------|------------------------------------|
| 517                        | 3.8158 (9.61%)       | 21.3807 (35.74%)     | 137.5918 (54.65%)    | 83.2014                            |

**Table S3.** Afterglow lifetimes at the donor of the CPDs-Fluc codoped PVA films under excitation at 360 nm.

| CPDs: Fluc | $\lambda_{Em}/\text{nm}$ | $\tau_1 / \text{ms}$ | $\tau_2 / \text{ms}$ | $\tau_3 / \text{ms}$ | $\langle\tau\rangle / \text{ms}$ |
|------------|--------------------------|----------------------|----------------------|----------------------|----------------------------------|
| 100:0      | 478                      | 3.9769 (5.43%)       | 30.3978 (34.66%)     | 158.8715 (59.91%)    | 105.9261                         |
| 100:0.1    | 478                      | 3.7279 (7.54%)       | 22.7898 (29.21%)     | 136.8537 (63.25%)    | 93.4957                          |
| 100:0.125  | 478                      | 1.5207 (17.13%)      | 16.5046 (25.49%)     | 146.1467 (57.37%)    | 88.3174                          |
| 100:0.25   | 478                      | 1.4737 (15.12%)      | 15.0256 (26.33%)     | 130.9830 (58.55%)    | 80.8650                          |
| 100:0.5    | 478                      | 1.4329 (17.93%)      | 17.0179 (28.21%)     | 130.3541 (53.86%)    | 75.2674                          |
| 100:1      | 478                      | 1.5325 (19.80%)      | 16.6525 (27.83%)     | 131.1154 (52.37%)    | 73.5992                          |
| 100:2      | 478                      | 1.5425 (21.16%)      | 14.4212 (28.71%)     | 122.6303 (50.13%)    | 65.9406                          |
| 100:5      | 478                      | 1.7917 (19.21%)      | 13.8780 (30.30%)     | 106.3292 (50.48%)    | 58.2259                          |
| 100:10     | 478                      | 1.9953 (23.66%)      | 15.9658 (36.57%)     | 110.3274 (39.77%)    | 50.1834                          |

**Table S4.** Afterglow lifetimes at the acceptor of the CPDs-Fluc codoped PVA films under excitation at 360 nm.

| CPDs :<br>Fluc | $\lambda_{Em}/\text{nm}$ | $\tau_1 / \text{ms}$ | $\tau_2 / \text{ms}$ | $\tau_3 / \text{ms}$ | $\langle\tau\rangle / \text{ms}$ |
|----------------|--------------------------|----------------------|----------------------|----------------------|----------------------------------|
| 100:0.1        | 521                      | 2.0777 (6.71%)       | 16.4387 (22.97%)     | 119.396 (70.32%)     | 87.8755                          |
| 100:0.125      | 521                      | 2.2740 (5.78%)       | 14.0034 (20.22%)     | 102.0927 (74.00%)    | 78.5154                          |
| 100:0.25       | 521                      | 1.9260 (7.50%)       | 14.2951 (20.72%)     | 102.8126 (71.77%)    | 76.8990                          |
| 100:0.5        | 521                      | 1.0397 (9.04%)       | 10.1496 (23.35%)     | 97.7169 (67.61%)     | 68.5322                          |
| 100:1          | 521                      | 1.1478 (11.31%)      | 9.8513 (25.78%)      | 96.8811 (62.90%)     | 63.6086                          |
| 100:2          | 521                      | 1.5816 (6.83%)       | 10.2457 (27.17%)     | 76.2231 (66.00%)     | 53.2002                          |
| 100:5          | 521                      | 0.6899 (5.74%)       | 5.2699 (31.36%)      | 42.6888 (62.90%)     | 28.5434                          |
| 100:10         | 521                      | 1.1850 (14.98%)      | 6.4860 (32.10%)      | 40.7382 (52.93%)     | 23.8210                          |

**Table S5.** Afterglow lifetimes at the donor of the CPDs-SR101 codoped PVA films under excitation at 360 nm.

| CPDs:<br>SR101 | $\lambda_{Em}/\text{nm}$ | $\tau_1 / \text{ms}$ | $\tau_2 / \text{ms}$ | $\tau_3 / \text{ms}$ | $\langle\tau\rangle / \text{ms}$ |
|----------------|--------------------------|----------------------|----------------------|----------------------|----------------------------------|
| 100:0          | 478                      | 3.9769 (5.43%)       | 30.3978 (34.66%)     | 158.8715 (59.91%)    | 105.9261                         |
| 100:0.1        | 478                      | 2.5887 (9.11%)       | 25.0756 (31.33%)     | 152.4134 (59.56%)    | 98.8716                          |
| 100:0.125      | 478                      | 5.3944 (11.41%)      | 35.0584 (44.62%)     | 171.5223 (43.97%)    | 91.6776                          |
| 100:0.25       | 478                      | 3.0175 (11.77%)      | 27.3486 (29.76%)     | 134.6705 (58.47%)    | 87.2377                          |
| 100:0.5        | 478                      | 2.7925 (12.80%)      | 21.6869 (31.13%)     | 125.5766 (56.07%)    | 77.5209                          |
| 100:1          | 478                      | 1.6216 (19.25%)      | 17.2033 (27.64%)     | 127.2909 (53.12%)    | 72.6809                          |
| 100:2          | 478                      | 1.5868 (22.62%)      | 10.0000 (18.98%)     | 110.0000 (58.40%)    | 66.4986                          |
| 100:5          | 478                      | 2.2110 (19.05%)      | 17.3943 (33.06%)     | 111.0785 (47.90%)    | 59.3756                          |
| 100:10         | 478                      | 1.7514 (20.88%)      | 14.2976 (33.65%)     | 106.7063 (45.46%)    | 53.6889                          |

**Table S6.** Afterglow lifetimes at the acceptor of the CPDs-SR101 codoped PVA films under excitation at 360 nm.

| CPDs:<br>SR101 | $\lambda_{Em}/\text{nm}$ | $\tau_1 / \text{ms}$ | $\tau_2 / \text{ms}$ | $\tau_3 / \text{ms}$ | $\langle\tau\rangle / \text{ms}$ |
|----------------|--------------------------|----------------------|----------------------|----------------------|----------------------------------|
| 100:0.1        | 621                      | 3.3325 (11.75%)      | 22.8262 (22.42%)     | 126.5732 (60.84%)    | 83.6522                          |
| 100:0.125      | 621                      | 3.1845 (8.34%)       | 16.5905 (25.18%)     | 97.1469 (66.48%)     | 69.0249                          |
| 100:0.25       | 621                      | 2.1383 (11.70%)      | 14.4704 (27.40%)     | 102.0868 (60.89%)    | 66.3803                          |
| 100:0.5        | 621                      | 3.2445 (13.96%)      | 17.5411 (26.09%)     | 96.4673 (59.94%)     | 62.8549                          |
| 100:1          | 621                      | 1.2192 (6.04%)       | 9.4181 (32.19%)      | 71.7662 (61.77%)     | 47.4330                          |
| 100:2          | 621                      | 1.7009 (16.01%)      | 12.4512 (36.59%)     | 88.6783 (47.40%)     | 46.8607                          |
| 100:5          | 621                      | 1.5282 (8.96%)       | 8.0444 (34.33%)      | 47.9676 (56.70%)     | 30.0985                          |
| 100:10         | 621                      | 1.1123 (24.56%)      | 8.5074 (34.77%)      | 61.3381 (40.67%)     | 28.1748                          |

**Table S7.** Afterglow lifetimes at 521 nm of the CPDs-Fluc-SR101 codoped PVA films under excitation at 360 nm.

| CPDs:<br>Fluc:SR101 | $\lambda_{Em}$ /<br>nm | $\tau_1$ / ms   | $\tau_2$ / ms    | $\tau_3$ / ms     | $\langle\tau\rangle$ / ms |
|---------------------|------------------------|-----------------|------------------|-------------------|---------------------------|
| 100:0.25:0          | 521                    | 1.5529 (18.64%) | 17.6924 (27.80%) | 137.3650 (53.56%) | 78.7812                   |
| 100:0.25:0.025      | 521                    | 1.4824 (18.04%) | 15.2880 (25.16%) | 122.5097 (56.81%) | 73.7050                   |
| 100:0.25:0.0625     | 521                    | 1.9549 (14.00%) | 14.5209 (25.72%) | 106.4758 (60.29%) | 68.1997                   |
| 100:0.25:0.125      | 521                    | 1.6203 (19.42%) | 14.6339 (29.36%) | 110.0000 (51.22%) | 60.9518                   |
| 100:0.25:0.1875     | 521                    | 1.5114 (21.21%) | 13.1690 (25.31%) | 96.3568 (53.48%)  | 55.1857                   |
